# Supplementary material
Source: publisher figshare collection journal article supplement (https://gsapubs.figshare.com/articles/dataset/_/13180142)
Supplement: Supplementary file 1 [file 1]

Hannon, J.S., Dietsch, C., and Huff, W.D., 2020, Trace-element and Sr and Nd isotopic geochemistry of Cretaceous bentonites in Wyoming and South Dakota tracks magmatic processes during eastward migration of Farallon arc plutons: GSA Bulletin, <https://doi.org/10.1130/B35796.1>.

## Supplemental Material

**Table S1.** Geochemical data for Bighorn Basin and South Dakota bentonites.

**Table S2.** Sr and Nd isotopic data.
